# Supplementary material
Source: HighWire-hosted journal article supplement (https://bmjopen.bmj.com/content/12/3/e058424)
Supplement: inline-supplementary-material-1 [file inline-supplementary-material-1.pdf]

Improving the mental health and mental health support available to adolescents with social care-experience via low-intensity life story work: A realist review protocol

## Supplementary File

### Search #1 Life Story Work

MEDLINE

**Medline (Ovid MEDLINE® Epub Ahead of Print, In-Process & Other Non-Indexed Citations, Ovid MEDLINE® Daily and Ovid MEDLINE®) 1946 to present**

Search run on 1 December 2021

| Searches                                                                                                                                                                                                    | Results | Type |
|-------------------------------------------------------------------------------------------------------------------------------------------------------------------------------------------------------------|---------|------|
| 1 ((life story or life history) adj2 (work or book* or resource* or tool*).ti,ab,kw.                                                                                                                        | 107     |      |
| 2 (personal history or biograph* or autobiograph*).ti,ab,kw.                                                                                                                                                | 30152   |      |
| 3 1 or 2                                                                                                                                                                                                    | 30262   |      |
| 4 (teen* or youth* or adolescen* or juvenile* or young* or child* or girl? or boy?).ti,ab,kw.                                                                                                               | 2435378 |      |
| 5 Adolescent/                                                                                                                                                                                               | 2143136 |      |
| 6 4 or 5                                                                                                                                                                                                    | 3811906 |      |
| 7 looked-after.ti,ab,kw.                                                                                                                                                                                    | 569     |      |
| 8 in care.ti,ab,kw.                                                                                                                                                                                         | 18400   |      |
| 9 ((foster* or social or public or state or local authority or residential or institutional or permanent or kinship or relative or substitute or out-of-home or shelter or surrogate) adj1 care*).ti,ab,kw. | 19263   |      |
| 10 (care leaver* or care-experience* or leaving care or care transition*).ti,ab,kw.                                                                                                                         | 6579    |      |
| 11 child welfare.ti,ab,kw.                                                                                                                                                                                  | 5173    |      |
| 12 (adopted or adoption or adoptive or adoptee*).ti,ab,kw.                                                                                                                                                  | 197909  |      |
| 13 Adoption/                                                                                                                                                                                                | 4869    |      |
| 14 Foster Home Care/                                                                                                                                                                                        | 3758    |      |
| 15 or/7-14                                                                                                                                                                                                  | 246890  |      |
| 16 3 and 6 and 15                                                                                                                                                                                           | 87      |      |

Improving the mental health and mental health support available to adolescents with social care-experience via low-intensity life story work: A realist review protocol

Embase

**Ovid Embase 1974 to Present**

|           | <b>Searches</b>                                                                                                                                                                                           | <b>Results</b> | <b>Type</b> |
|-----------|-----------------------------------------------------------------------------------------------------------------------------------------------------------------------------------------------------------|----------------|-------------|
| <b>1</b>  | ((life story or life history) adj2 (work or book* or resource* or tool*)).ti,ab,kw.                                                                                                                       | 148            |             |
| <b>2</b>  | (personal history or biograph* or autobiograph*).ti,ab,kw.                                                                                                                                                | 25170          |             |
| <b>3</b>  | 1 or 2                                                                                                                                                                                                    | 25307          |             |
| <b>4</b>  | (teen* or youth* or adolescen* or juvenile* or young* or child* or girl? or boy?).ti,ab,kw.                                                                                                               | 3050210        |             |
| <b>5</b>  | adolescent/ or exp institutionalized adolescent/                                                                                                                                                          | 1629539        |             |
| <b>6</b>  | 4 or 5                                                                                                                                                                                                    | 3924528        |             |
| <b>7</b>  | looked-after.ti,ab,kw.                                                                                                                                                                                    | 1002           |             |
| <b>8</b>  | in care.ti,ab,kw.                                                                                                                                                                                         | 26487          |             |
| <b>9</b>  | ((foster* or social or public or state or local authority or residential or institutional or permanent or kinship or relative or substitute or out-of-home or shelter or surrogate) adj1 care*).ti,ab,kw. | 23880          |             |
| <b>10</b> | (care leaver* or care-experience* or leaving care or care transition*).ti,ab,kw.                                                                                                                          | 8952           |             |
| <b>11</b> | child welfare.ti,ab,kw.                                                                                                                                                                                   | 3648           |             |
| <b>12</b> | (adopted or adoption or adoptive or adoptee*).ti,ab,kw.                                                                                                                                                   | 257330         |             |
| <b>13</b> | adoption/                                                                                                                                                                                                 | 18302          |             |
| <b>14</b> | foster care/ or foster child/                                                                                                                                                                             | 5008           |             |
| <b>15</b> | or/7-14                                                                                                                                                                                                   | 320109         |             |
| <b>16</b> | 3 and 6 and 15                                                                                                                                                                                            | 116            |             |

Search run on 1 December 2021

Improving the mental health and mental health support available to adolescents with social care-experience via low-intensity life story work: A realist review protocol

PsycINFO

**Ovid PsycINFO 1806 to Present**

Search run on 1 December 2021

|           | <b>Searches</b>                                                                                                                                                                                        | <b>Results</b> | <b>Type</b> |
|-----------|--------------------------------------------------------------------------------------------------------------------------------------------------------------------------------------------------------|----------------|-------------|
| <b>1</b>  | ((life story or life history) adj2 (work or book* or resource* or tool*)).ti,ab.                                                                                                                       | 126            |             |
| <b>2</b>  | (personal history or biograph* or autobiograph*).ti,ab.                                                                                                                                                | 27009          |             |
| <b>3</b>  | life review/ or autobiographical memory/                                                                                                                                                               | 5007           |             |
| <b>4</b>  | or/1-3                                                                                                                                                                                                 | 28393          |             |
| <b>5</b>  | (teen* or youth* or adolescen* or juvenile* or young* or child* or girl? or boy?).ti,ab.                                                                                                               | 1104726        |             |
| <b>6</b>  | looked-after.ti,ab.                                                                                                                                                                                    | 656            |             |
| <b>7</b>  | in care.ti,ab.                                                                                                                                                                                         | 7188           |             |
| <b>8</b>  | ((foster* or social or public or state or local authority or residential or institutional or permanent or kinship or relative or substitute or out-of-home or shelter or surrogate) adj1 care*).ti,ab. | 19519          |             |
| <b>9</b>  | (care leaver* or care-experience* or leaving care or care transition*).ti,ab.                                                                                                                          | 2950           |             |
| <b>10</b> | child welfare.ti,ab.                                                                                                                                                                                   | 7784           |             |
| <b>11</b> | (adopted or adoption or adoptive or adoptee*).ti,ab.                                                                                                                                                   | 66430          |             |
| <b>12</b> | adoption (child)/ or adopted children/ or adoptive parents/                                                                                                                                            | 5319           |             |
| <b>13</b> | foster care/ or foster children/ or foster parents/                                                                                                                                                    | 7544           |             |
| <b>14</b> | or/6-13                                                                                                                                                                                                | 99727          |             |
| <b>15</b> | 4 and 5 and 14                                                                                                                                                                                         | 203            |             |

Improving the mental health and mental health support available to adolescents with social care-experience via low-intensity life story work: A realist review protocol

Proquest Sociology Collection

ASSIA (Applied Social Sciences Index & Abstracts) (1987 to present); Sociological Abstracts (1952 to present); Sociology Database (1985 to present)

Search run on 1 December 2021

| Searches                                                                                                                                                                                                                                                                                                                                                                                                                                                                                                                                                                                                                                                                                                                                      | Results | Type |
|-----------------------------------------------------------------------------------------------------------------------------------------------------------------------------------------------------------------------------------------------------------------------------------------------------------------------------------------------------------------------------------------------------------------------------------------------------------------------------------------------------------------------------------------------------------------------------------------------------------------------------------------------------------------------------------------------------------------------------------------------|---------|------|
| 1 noft(("life story" OR "life history") N/2 (work OR book* OR resource* OR tool*))                                                                                                                                                                                                                                                                                                                                                                                                                                                                                                                                                                                                                                                            | 223     |      |
| 2 noft(("personal history" OR biograph* OR autobiograph*))                                                                                                                                                                                                                                                                                                                                                                                                                                                                                                                                                                                                                                                                                    | 30,652  |      |
| 3 1 or 2                                                                                                                                                                                                                                                                                                                                                                                                                                                                                                                                                                                                                                                                                                                                      | 30,836  |      |
| 4 noft((teen* OR youth* OR adolescen* OR juvenile* OR young* OR child* OR boy* OR girl*))                                                                                                                                                                                                                                                                                                                                                                                                                                                                                                                                                                                                                                                     | 776,851 |      |
| 5 noft("looked after" OR "looked-after")                                                                                                                                                                                                                                                                                                                                                                                                                                                                                                                                                                                                                                                                                                      | 1,477   |      |
| 6 noft("in care")                                                                                                                                                                                                                                                                                                                                                                                                                                                                                                                                                                                                                                                                                                                             | 8,932   |      |
| 7 noft((foster* OR social OR public OR state OR "local authority" OR residential OR institutional OR permanent OR kinship OR relative OR substitute OR "out of home" OR out-of-home OR shelter OR surrogate) N/1 care*)                                                                                                                                                                                                                                                                                                                                                                                                                                                                                                                       | 49,937  |      |
| 8 noft("care leaver" OR "care experience*" OR care-experience* OR "leaving care" OR "care transition**")                                                                                                                                                                                                                                                                                                                                                                                                                                                                                                                                                                                                                                      | 3,219   |      |
| 9 noft("child welfare")                                                                                                                                                                                                                                                                                                                                                                                                                                                                                                                                                                                                                                                                                                                       | 27,228  |      |
| 10 noft(adopted OR adoption OR adoptive OR adoptee*)                                                                                                                                                                                                                                                                                                                                                                                                                                                                                                                                                                                                                                                                                          | 35,937  |      |
| 11 5 or 6 or 7 or 8 or 9 or 10                                                                                                                                                                                                                                                                                                                                                                                                                                                                                                                                                                                                                                                                                                                | 110774  |      |
| 12 3 and 4 and 12                                                                                                                                                                                                                                                                                                                                                                                                                                                                                                                                                                                                                                                                                                                             | 372     |      |
| <b>Full</b> (noft(("life story" OR "life history") NEAR/2 (work OR book* OR resource* OR tool*)) OR noft(("personal history" OR biograph* OR autobiograph*))) AND (noft("looked after" OR "looked-after") OR noft("in care") OR noft((foster* OR social OR public OR state OR "local authority" OR residential OR institutional OR permanent OR kinship OR relative OR substitute OR "out of home" OR out-of-home OR shelter OR surrogate) NEAR/1 care*) OR noft("care leaver" OR "care experience*" OR care-experience* OR "leaving care" OR "care transition**") OR noft("child welfare") OR noft(adopted OR adoption OR adoptive OR adoptee*)) AND noft((teen* OR youth* OR adolescen* OR juvenile* OR young* OR child* OR boy* OR girl*)) |         |      |

Improving the mental health and mental health support available to adolescents with social care-experience via low-intensity life story work: A realist review protocol

## CINAHL

**Ebscohost CINAHL (Cumulative Index to Nursing and Allied Health Literature) (Start date unknown)**

Search run 1 December 2021

|            | <b>Searches</b>                                                                                                                                                                                                                                                                                                                                                                                                                        | <b>Results</b> | <b>Type</b> |
|------------|----------------------------------------------------------------------------------------------------------------------------------------------------------------------------------------------------------------------------------------------------------------------------------------------------------------------------------------------------------------------------------------------------------------------------------------|----------------|-------------|
| <b>S1</b>  | TI ("life story" OR "life history") N2 (work OR book* OR resource* OR tool*) OR AB ("life story" OR "life history") N2 (work OR book* OR resource* OR tool*)                                                                                                                                                                                                                                                                           | 135            |             |
| <b>S2</b>  | TI ("personal history" OR biograph* OR autobiograph*) OR AB ("personal history" OR biograph* OR autobiograph*)                                                                                                                                                                                                                                                                                                                         | 6148           |             |
| <b>S3</b>  | (MH "Life History Review") OR (MH "Autobiographical Memory")                                                                                                                                                                                                                                                                                                                                                                           | 1592           |             |
| <b>S4</b>  | S1 OR S2 OR S3                                                                                                                                                                                                                                                                                                                                                                                                                         | 7675           |             |
| <b>S5</b>  | TI teen* OR youth* OR adolescen* OR juvenile* OR young* OR child* OR girl* OR boy* OR AB teen* OR youth* OR adolescen* OR juvenile* OR young* OR child* OR girl* OR boy*                                                                                                                                                                                                                                                               | 1475230        |             |
| <b>S6</b>  | (MH "Adolescence")                                                                                                                                                                                                                                                                                                                                                                                                                     | 564984         |             |
| <b>S7</b>  | S5 OR S6                                                                                                                                                                                                                                                                                                                                                                                                                               | 1475230        |             |
| <b>S8</b>  | TI "looked after" OR looked-after OR AB "looked after" OR looked-after                                                                                                                                                                                                                                                                                                                                                                 | 718            |             |
| <b>S9</b>  | TI "in care" OR AB "in care"                                                                                                                                                                                                                                                                                                                                                                                                           | 929827         |             |
| <b>S10</b> | TI (foster* OR social OR public OR state OR "local authority" OR residential OR institutional OR permanent OR kinship OR relative OR substitute OR "out of home" OR out-of-home OR shelter OR surrogate) N1 care* OR AB (foster* OR social OR public OR state OR "local authority" OR residential OR institutional OR permanent OR kinship OR relative OR substitute OR "out of home" OR out-of-home OR shelter OR surrogate) N1 care* | 31046          |             |
| <b>S11</b> | TI ("care leaver" OR "care experience*" OR care-experience* OR "leaving care" OR "care transition*") OR AB ("care leaver" OR "care experience*" OR care-experience* OR "leaving care" OR "care transition*")                                                                                                                                                                                                                           | 5417           |             |
| <b>S12</b> | TI "child welfare" OR AB "child welfare"                                                                                                                                                                                                                                                                                                                                                                                               | 4202           |             |
| <b>S13</b> | TI adopted or adoption or adoptive or adoptee* OR AB adopted or adoption or adoptive or adoptee*                                                                                                                                                                                                                                                                                                                                       | 57750          |             |
| <b>S14</b> | (MH "Adoption") OR (MH "Child, Adopted") OR (MH "Adoptive Parents")                                                                                                                                                                                                                                                                                                                                                                    | 4085           |             |
| <b>S15</b> | (MH "Foster Home Care") OR (MH "Foster Parents") OR (MH "Child, Foster")                                                                                                                                                                                                                                                                                                                                                               | 6372           |             |
| <b>S16</b> | S8 OR S9 OR S10 OR S11 OR S12 OR S13 OR S14 OR S15                                                                                                                                                                                                                                                                                                                                                                                     | 9 75840        |             |
| <b>S17</b> | S4 AND S7 AND S16                                                                                                                                                                                                                                                                                                                                                                                                                      | 359            |             |

Improving the mental health and mental health support available to adolescents with social care-experience via low-intensity life story work: A realist review protocol

## CDAS

### Ebscohost CDAS (Child Development and Adolescent Studies) (Start date unknown)

Search run 1 December 2021

|            | Searches                                                                                                                                                                                                                                                                                                                                                                                                                               | Results | Type |
|------------|----------------------------------------------------------------------------------------------------------------------------------------------------------------------------------------------------------------------------------------------------------------------------------------------------------------------------------------------------------------------------------------------------------------------------------------|---------|------|
| <b>S1</b>  | TI ("life story" OR "life history") N2 (work OR book* OR resource* OR tool*) OR AB ("life story" OR "life history") N2 (work OR book* OR resource* OR tool*)                                                                                                                                                                                                                                                                           | 29      |      |
| <b>S2</b>  | TI ("personal history" OR biograph* OR autobiograph*) OR AB ("personal history" OR biograph* OR autobiograph*)                                                                                                                                                                                                                                                                                                                         | 1442    |      |
| <b>S3</b>  | S1 OR S2                                                                                                                                                                                                                                                                                                                                                                                                                               | 1471    |      |
| <b>S4</b>  | TI "looked after" OR looked-after OR AB "looked after" OR looked-after                                                                                                                                                                                                                                                                                                                                                                 | 696     |      |
| <b>S5</b>  | TI "in care" OR AB "in care"                                                                                                                                                                                                                                                                                                                                                                                                           | 32026   |      |
| <b>S6</b>  | TI (foster* OR social OR public OR state OR "local authority" OR residential OR institutional OR permanent OR kinship OR relative OR substitute OR "out of home" OR out-of-home OR shelter OR surrogate) N1 care* OR AB (foster* OR social OR public OR state OR "local authority" OR residential OR institutional OR permanent OR kinship OR relative OR substitute OR "out of home" OR out-of-home OR shelter OR surrogate) N1 care* | 7379    |      |
| <b>S7</b>  | TI ("care leaver" OR "care experience*" OR care-experience* OR "leaving care" OR "care transition*") OR AB ("care leaver" OR "care experience*" OR care-experience* OR "leaving care" OR "care transition*")                                                                                                                                                                                                                           | 651     |      |
| <b>S8</b>  | TI "child welfare" OR AB "child welfare"                                                                                                                                                                                                                                                                                                                                                                                               | 5715    |      |
| <b>S9</b>  | TI adopted or adoption or adoptive or adoptee* OR AB adopted or adoption or adoptive or adoptee*                                                                                                                                                                                                                                                                                                                                       | 6798    |      |
| <b>S10</b> | S4 OR S5 OR S6 OR S7 OR S8 OR S9                                                                                                                                                                                                                                                                                                                                                                                                       | 41463   |      |
| <b>S11</b> | S3 AND S10                                                                                                                                                                                                                                                                                                                                                                                                                             | 86      |      |
|            | <i>NB Search string describing adolescents removed due to population focus in this database</i>                                                                                                                                                                                                                                                                                                                                        |         |      |

Improving the mental health and mental health support available to adolescents with social care-experience via low-intensity life story work: A realist review protocol

#### Web of Science

#### Clarivate Web of Science Core Collection (SCI-EXPANDED and SSCI indexes) 1900 to present

Search run 1 December 2021

|    | Searches                                                                                                                                                                                                                | Results | Type |
|----|-------------------------------------------------------------------------------------------------------------------------------------------------------------------------------------------------------------------------|---------|------|
| 1  | TS=(((("life story" OR "life history") NEAR/2 (work OR book* OR resource* OR tool*)))                                                                                                                                   | 449     |      |
| 2  | TS=(((("personal history" OR biograph* OR autobiograph*)))                                                                                                                                                              | 41850   |      |
| 3  | 1 OR 2                                                                                                                                                                                                                  | 41850   |      |
| 4  | TS=(((teen* OR youth* OR adolescen* OR juvenile* OR young* OR child* OR boy* OR girl*)))                                                                                                                                | 3066217 |      |
| 5  | TS=(("looked after" OR "looked-after"))                                                                                                                                                                                 | 768     |      |
| 6  | TS=(("in care"))                                                                                                                                                                                                        | 16889   |      |
| 7  | TS=((foster* OR social OR public OR state OR "local authority" OR residential OR institutional OR permanent OR kinship OR relative OR substitute OR "out of home" OR out-of-home OR shelter OR surrogate) NEAR/1 care*) | 43040   |      |
| 8  | TS=("care leaver" OR "care experience*" OR care-experience* OR "leaving care" OR "care transition*")                                                                                                                    | 6615    |      |
| 9  | TS=("child welfare")                                                                                                                                                                                                    | 8348    |      |
| 10 | TS=(adopted OR adoption OR adoptive OR adoptee*)                                                                                                                                                                        | 655351  |      |
| 11 | 5 OR 6 OR 7 OR 8 OR 9 OR 10                                                                                                                                                                                             | 721923  |      |
| 12 | 3 AND 4 AND 11                                                                                                                                                                                                          | 233     |      |

Improving the mental health and mental health support available to adolescents with social care-experience via low-intensity life story work: A realist review protocol

Social Care Online

**SCIE Social Care Online 1980 to present**

Search run 3 February 2022

|   | Searches                                                                                                                                                                                                                                                                                                                      | Results | Type |
|---|-------------------------------------------------------------------------------------------------------------------------------------------------------------------------------------------------------------------------------------------------------------------------------------------------------------------------------|---------|------|
| 1 | "life story" OR "life history"                                                                                                                                                                                                                                                                                                |         |      |
| 2 | teen OR youth OR adolescent OR juvenile OR young OR child<br>OR girl OR boy                                                                                                                                                                                                                                                   |         |      |
| 3 | "looked after" OR "foster care" OR "social care" OR "public care" OR "state care" OR "local authority care" OR "residential care" OR "institutional care" OR "permanent care" OR "kinship care" OR "relative care" OR "substitute care" OR "out of home care" OR "shelter care" OR adopted OR adoption OR adoptive OR adoptee |         |      |
| 4 | (1 AND 2 AND 3)                                                                                                                                                                                                                                                                                                               | 58      |      |
|   | <i>NB Search strategies were adapted for simpler search interface; word variations included automatically</i>                                                                                                                                                                                                                 |         |      |



Improving the mental health and mental health support available to adolescents with social care-experience via low-intensity life story work: A realist review protocol

## Search #2 Low intensity mental health interventions

### MEDLINE

**Medline (Ovid MEDLINE® Epub Ahead of Print, In-Process & Other Non-Indexed Citations, Ovid MEDLINE® Daily and Ovid MEDLINE®) 1946 to present**

Search run on 2 February 2022

| Searches                                                                                                                                                                                                                      | Results | Type |
|-------------------------------------------------------------------------------------------------------------------------------------------------------------------------------------------------------------------------------|---------|------|
| 1 (teen* or youth* or adolescen* or juvenile*).ti,ab,kw.                                                                                                                                                                      | 486326  |      |
| 2 Adolescent/                                                                                                                                                                                                                 | 2155772 |      |
| 3 1 or 2                                                                                                                                                                                                                      | 2326981 |      |
| 4 looked-after.ti,ab,kw.                                                                                                                                                                                                      | 585     |      |
| 5 ((foster* or social or public or state or local authority or residential or institutional or permanent or kinship or relative or substitute or out-of-home or shelter or surrogate) adj1 care*).ti,ab,kw.                   | 19561   |      |
| 6 (care leaver* or care-experience* or leaving care or care transition*).ti,ab,kw.                                                                                                                                            | 6715    |      |
| 7 child welfare.ti,ab,kw.                                                                                                                                                                                                     | 5217    |      |
| 8 Adoption/                                                                                                                                                                                                                   | 4875    |      |
| 9 Foster Home Care/                                                                                                                                                                                                           | 3770    |      |
| 10 or/4-9                                                                                                                                                                                                                     | 37119   |      |
| 11 ((adopted or adoption or adoptive or adoptee* or in-care or "in care") adj3 (teen* or youth* or adolescen* or juvenile* or young* or child* or girl? or boy?)).ti,ab,kw.                                                   | 3708    |      |
| 12 10 or 11                                                                                                                                                                                                                   | 38990   |      |
| 13 ((low-intensity or minimal or brief or online or internet or tele* or mobile* or e-health or m-health or virtual) adj2 (intervention* or program* or service* or package* or training* or therap* or treatment*).ti,ab,kw. | 48784   |      |
| 14 Therapy, Computer-Assisted/                                                                                                                                                                                                | 6949    |      |
| 15 Computer-Assisted Instruction/                                                                                                                                                                                             | 12318   |      |
| 16 Telemedicine/                                                                                                                                                                                                              | 32176   |      |
| 17 or/13-16                                                                                                                                                                                                                   | 92385   |      |
| 18 (lay-therapy or lay-therapist* or lay-worker* or lay-person* or lay-people).ti,ab,kw.                                                                                                                                      | 2143    |      |
| 19 (para-professional* or non-specialist* or non-clinician* or health worker* or support worker*).ti,ab,kw.                                                                                                                   | 24797   |      |
| 20 ((unqualified or unregistered or volunt*) adj2 (therap* or worker* or coach* or facilitator* or practitioner*).ti,ab,kw.                                                                                                   | 1337    |      |
| 21 Community Health Workers/                                                                                                                                                                                                  | 6092    |      |
| 22 or/18-21                                                                                                                                                                                                                   | 30823   |      |
| 23 (self-help or self-manage*).ti,ab,kw.                                                                                                                                                                                      | 31158   |      |
| 24 Self Care/                                                                                                                                                                                                                 | 35033   |      |
| 25 or/23-24                                                                                                                                                                                                                   | 57185   |      |
| 26 ((group* or peer*) adj2 (intervention* or program* or service* or package* or training* or therap* or treatment)).ti,ab,kw.                                                                                                | 228457  |      |

Improving the mental health and mental health support available to adolescents with social care-experience via low-intensity life story work: A realist review protocol

|           |                                                      |         |
|-----------|------------------------------------------------------|---------|
| <b>27</b> | Self-Help Groups/                                    | 9435    |
| <b>28</b> | or/26-27                                             | 236909  |
| <b>29</b> | 17 or 22 or 25 or 28                                 | 398896  |
| <b>30</b> | (mental health or wellbeing or well-being).ti,ab,kw. | 280239  |
| <b>31</b> | mental health/ or exp mental disorders/              | 1382592 |
| <b>32</b> | Quality of Life/                                     | 232462  |
| <b>33</b> | or/30-32                                             | 1732433 |
| <b>34</b> | 3 and 12 and 29 and 33                               | 160     |
| <b>35</b> | limit 34 to english language                         | 151     |

Improving the mental health and mental health support available to adolescents with social care-experience via low-intensity life story work: A realist review protocol

Embase

**Ovid Embase 1974 to Present**

Search run on 2 February 2022

|    | <b>Searches</b>                                                                                                                                                                                                            | <b>Results</b> | <b>Type</b> |
|----|----------------------------------------------------------------------------------------------------------------------------------------------------------------------------------------------------------------------------|----------------|-------------|
| 1  | (teen* or youth* or adolescen* or juvenile*).ti,ab,kw.                                                                                                                                                                     | 601244         |             |
| 2  | adolescent/ or institutionalized adolescent/                                                                                                                                                                               | 1644483        |             |
| 3  | 1 or 2                                                                                                                                                                                                                     | 1868684        |             |
| 4  | looked-after.ti,ab,kw.                                                                                                                                                                                                     | 1012           |             |
| 5  | ((foster* or social or public or state or local authority or residential or institutional or permanent or kinship or relative or substitute or out-of-home or shelter or surrogate) adj1 care*).ti,ab,kw.                  | 24293          |             |
| 6  | (care leaver* or care-experience* or leaving care or care transition*).ti,ab,kw.                                                                                                                                           | 9146           |             |
| 7  | child welfare.ti,ab,kw.                                                                                                                                                                                                    | 3695           |             |
| 8  | adoption/                                                                                                                                                                                                                  | 18546          |             |
| 9  | foster care/ or foster child/                                                                                                                                                                                              | 5037           |             |
| 10 | or/4-9                                                                                                                                                                                                                     | 56946          |             |
| 11 | ((adopted or adoption or adoptive or adoptee* or in-care or "in care") adj3 (teen* or youth* or adolescen* or juvenile* or young* or child* or girl? or boy?)).ti,ab,kw.                                                   | 4485           |             |
| 12 | 10 or 11                                                                                                                                                                                                                   | 59432          |             |
| 13 | ((low-intensity or minimal or brief or online or internet or tele* or mobile* or e-health or m-health or virtual) adj2 (intervention* or program* or service* or package* or training* or therap* or treatment*).ti,ab,kw. | 65233          |             |
| 14 | computer assisted therapy/                                                                                                                                                                                                 | 4801           |             |
| 15 | Computer-Assisted Instruction/                                                                                                                                                                                             | 81963          |             |
| 16 | telemedicine/ or exp teleconsultation/ or exp telemonitoring/ or exp telepsychiatry/ or exp telepsychology/ or exp teletherapy/ or exp video consultation/                                                                 | 51669          |             |
| 17 | or/13-16                                                                                                                                                                                                                   | 193129         |             |
| 18 | (lay-therapy or lay-therapist* or lay-worker* or lay-person* or lay-people).ti,ab,kw.                                                                                                                                      | 2836           |             |
| 19 | (para-professional* or non-specialist* or non-clinician* or health worker* or support worker*).ti,ab,kw.                                                                                                                   | 29728          |             |
| 20 | ((unqualified or unregistered or volunt*) adj2 (therap* or worker* or coach* or facilitator* or practitioner*).ti,ab,kw.                                                                                                   | 1615           |             |
| 21 | voluntary worker/ or exp volunteer/                                                                                                                                                                                        | 64329          |             |
| 22 | lay health worker/ or mental health care personnel/ or health auxiliary/                                                                                                                                                   | 11904          |             |
| 23 | or/18-22                                                                                                                                                                                                                   | 103668         |             |
| 24 | (self-help or self-manage*).ti,ab,kw.                                                                                                                                                                                      | 43320          |             |

Improving the mental health and mental health support available to adolescents with social care-experience via low-intensity life story work: A realist review protocol

|           |                                                                                                                             |         |
|-----------|-----------------------------------------------------------------------------------------------------------------------------|---------|
| <b>25</b> | self care/ or self help/                                                                                                    | 80302   |
| <b>26</b> | or/24-25                                                                                                                    | 94122   |
| <b>27</b> | ((group* or peer*) adj2 (intervention* or program* or service* or package* or training* or therap* or treatment)).ti,ab,kw. | 333041  |
| <b>28</b> | group therapy/                                                                                                              | 19771   |
| <b>29</b> | or/27-28                                                                                                                    | 343422  |
| <b>30</b> | 17 or 23 or 26 or 29                                                                                                        | 706680  |
| <b>31</b> | (mental health or wellbeing or well-being).ti,ab,kw.                                                                        | 349720  |
| <b>32</b> | exp mental health/ or exp mental disease/                                                                                   | 2482186 |
| <b>33</b> | quality of life/ or exp wellbeing/                                                                                          | 614976  |
| <b>34</b> | or/31-33                                                                                                                    | 3026040 |
| <b>35</b> | 3 and 12 and 30 and 34                                                                                                      | 283     |
| <b>36</b> | limit 35 to english language                                                                                                | 274     |

Improving the mental health and mental health support available to adolescents with social care-experience via low-intensity life story work: A realist review protocol

PsycINFO

Ovid PsycINFO 1806 to Present

Search run on 2 February 2022

|    | Searches                                                                                                                                                                                                                | Results | Type |
|----|-------------------------------------------------------------------------------------------------------------------------------------------------------------------------------------------------------------------------|---------|------|
| 1  | (teen* or youth* or adolescen* or juvenile*).ti,ab.                                                                                                                                                                     | 344737  |      |
| 2  | looked-after.ti,ab.                                                                                                                                                                                                     | 662     |      |
| 3  | ((foster* or social or public or state or local authority or residential or institutional or permanent or kinship or relative or substitute or out-of-home or shelter or surrogate) adj1 care*).ti,ab.                  | 19672   |      |
| 4  | (care leaver* or care-experience* or leaving care or care transition*).ti,ab.                                                                                                                                           | 2980    |      |
| 5  | child welfare.ti,ab.                                                                                                                                                                                                    | 7836    |      |
| 6  | adoption (child)/ or adopted children/ or adoptive parents/                                                                                                                                                             | 5337    |      |
| 7  | foster care/ or foster children/ or foster parents/                                                                                                                                                                     | 7582    |      |
| 8  | or/2-7                                                                                                                                                                                                                  | 34369   |      |
| 9  | ((adopted or adoption or adoptive or adoptee* or in-care or "in care") adj3 (teen* or youth* or adolescen* or juvenile* or young* or child* or girl? or boy?)).ti,ab.                                                   | 5753    |      |
| 10 | 8 or 9                                                                                                                                                                                                                  | 36284   |      |
| 11 | ((low-intensity or minimal or brief or online or internet or tele* or mobile* or e-health or m-health or virtual) adj2 (intervention* or program* or service* or package* or training* or therap* or treatment*).ti,ab. | 28828   |      |
| 12 | exp computer assisted therapy/                                                                                                                                                                                          | 11642   |      |
| 13 | exp computer assisted instruction/                                                                                                                                                                                      | 21848   |      |
| 14 | or/11-13                                                                                                                                                                                                                | 57608   |      |
| 15 | (lay-therapy or lay-therapist* or lay-worker* or lay-person* or lay-people).ti,ab.                                                                                                                                      | 1793    |      |
| 16 | (para-professional* or non-specialist* or non-clinician* or health worker* or support worker*).ti,ab.                                                                                                                   | 7045    |      |
| 17 | ((unqualified or unregistered or volunt*) adj2 (therap* or worker* or coach* or facilitator* or practitioner*).ti,ab.                                                                                                   | 746     |      |
| 18 | volunteers/                                                                                                                                                                                                             | 5507    |      |
| 19 | or/15-18                                                                                                                                                                                                                | 14762   |      |
| 20 | (self-help or self-manage*).ti,ab.                                                                                                                                                                                      | 19273   |      |
| 21 | self-care/                                                                                                                                                                                                              | 3097    |      |
| 22 | self-help techniques/                                                                                                                                                                                                   | 4398    |      |
| 23 | or/20-22                                                                                                                                                                                                                | 23360   |      |

Improving the mental health and mental health support available to adolescents with social care-experience via low-intensity life story work: A realist review protocol

|           |                                                                                                                          |         |
|-----------|--------------------------------------------------------------------------------------------------------------------------|---------|
| <b>24</b> | ((group* or peer*) adj2 (intervention* or program* or service* or package* or training* or therap* or treatment)).ti,ab. | 75638   |
| <b>25</b> | group psychotherapy/                                                                                                     | 20529   |
| <b>26</b> | support groups/                                                                                                          | 4449    |
| <b>27</b> | or/24-26                                                                                                                 | 86800   |
| <b>28</b> | 14 or 19 or 23 or 27                                                                                                     | 173409  |
| <b>29</b> | (mental health or wellbeing or well-being).ti,ab.                                                                        | 289304  |
| <b>30</b> | exp mental health/                                                                                                       | 77446   |
| <b>31</b> | exp mental disorders/                                                                                                    | 919736  |
| <b>32</b> | well being/ or exp spiritual well being/                                                                                 | 51717   |
| <b>33</b> | quality of life/                                                                                                         | 44133   |
| <b>34</b> | or/29-33                                                                                                                 | 1164452 |
| <b>35</b> | 1 and 10 and 28 and 34                                                                                                   | 137     |
| <b>36</b> | limit 35 to english language                                                                                             | 130     |

Improving the mental health and mental health support available to adolescents with social care-experience via low-intensity life story work: A realist review protocol

Proquest Sociology Collection

ASSIA (Applied Social Sciences Index & Abstracts) (1987 to present); Sociological Abstracts (1952 to present); Sociology Database (1985 to present)

Search run on 2 February 2022

| Full String | Searches                                                                                                                                                                                                                                                                                                                                                                                                                                                                                                                                                                                                                                                                                                                                                                                                                                                                                                                                                                                                                                                                                                                                                                                                                                                                                                                                                                                                                                               | Results | Type |
|-------------|--------------------------------------------------------------------------------------------------------------------------------------------------------------------------------------------------------------------------------------------------------------------------------------------------------------------------------------------------------------------------------------------------------------------------------------------------------------------------------------------------------------------------------------------------------------------------------------------------------------------------------------------------------------------------------------------------------------------------------------------------------------------------------------------------------------------------------------------------------------------------------------------------------------------------------------------------------------------------------------------------------------------------------------------------------------------------------------------------------------------------------------------------------------------------------------------------------------------------------------------------------------------------------------------------------------------------------------------------------------------------------------------------------------------------------------------------------|---------|------|
|             | (noft((teen* OR youth* OR adolescen* OR juvenile*)) AND (noft("looked after" OR "looked-after") OR noft((foster* OR social OR public OR state OR "local authority" OR residential OR institutional OR permanent OR kinship OR relative OR substitute OR "out of home" OR out-of-home OR shelter OR surrogate) N/1 care*) OR noft("care leaver" OR "care experience*" OR care-experience* OR "leaving care" OR "care transition*") OR noft("child welfare") OR noft(((adopted or adoption or adoptive or adoptee* or in-care or "in care") N/3 (teen* or youth* or adolescen* or juvenile* or young* or child* or girl? or boy?)))) AND (noft((low-intensity or minimal or brief or online or internet or tele* or mobile* or e-health or m-health or virtual) N/2 (intervention* or program* or service* or package* or training* or therap* or treatment*)) OR noft((lay-therapy or lay-therapist* or lay-worker* or lay-person* or lay-people)) OR noft((para-professional* or non-specialist* or non-clinician* or ("health worker" OR "health workers") or ("support worker" OR "support workers")))) OR noft((unqualified OR unregistered OR volunt*) NEAR/2 (therap* OR worker* OR coach* OR facilitator* OR practitioner*)) OR noft((self-help OR self-manage*)) OR noft((group* or peer*) N/2 (intervention* or program* or service* or package* or training* or therap* or treatment)))) AND noft("mental health" or wellbeing or well-being) | 249     |      |
|             | (Filter: English language)                                                                                                                                                                                                                                                                                                                                                                                                                                                                                                                                                                                                                                                                                                                                                                                                                                                                                                                                                                                                                                                                                                                                                                                                                                                                                                                                                                                                                             |         |      |

Improving the mental health and mental health support available to adolescents with social care-experience via low-intensity life story work: A realist review protocol

## CINAHL

**Ebscohost CINAHL (Cumulative Index to Nursing and Allied Health Literature) (Start date unknown)**

Search run 2 February 2022

|            | <b>Searches</b>                                                                                                                                                                                                                                  | <b>Results</b> | <b>Type</b> |
|------------|--------------------------------------------------------------------------------------------------------------------------------------------------------------------------------------------------------------------------------------------------|----------------|-------------|
| <b>S32</b> | S25 AND S30                                                                                                                                                                                                                                      | 471            |             |
| <b>S31</b> | S25 AND S30                                                                                                                                                                                                                                      | 477            |             |
| <b>S30</b> | S26 OR S27 OR S28 OR S29                                                                                                                                                                                                                         | 835,613        |             |
| <b>S29</b> | (MH "Quality of Life")                                                                                                                                                                                                                           | 127,552        |             |
| <b>S28</b> | (MH "Mental Disorders+")                                                                                                                                                                                                                         | 611,172        |             |
| <b>S27</b> | (MH "Mental Health")                                                                                                                                                                                                                             | 46,077         |             |
| <b>S26</b> | TI ( "mental health" OR wellbeing OR well-being ) OR AB ( "mental health" or wellbeing or well-being )                                                                                                                                           | 182,035        |             |
| <b>S25</b> | S12 AND S24                                                                                                                                                                                                                                      | 1,451          |             |
| <b>S24</b> | S13 OR S14 OR S15 OR S16 OR S17 OR S18 OR S19 OR S20 OR S21 OR S22 OR S23                                                                                                                                                                        | 216,784        |             |
| <b>S23</b> | (MH "Support Groups")                                                                                                                                                                                                                            | 11,056         |             |
| <b>S22</b> | TI ( ((group* or peer*) N2 (intervention* or program* or service* or package* or training* or therap* or treatment)) ) OR AB ( ((group* or peer*) N2 (intervention* or program* or service* or package* or training* or therap* or treatment)) ) | 99,368         |             |
| <b>S21</b> | (MH "Self Care")                                                                                                                                                                                                                                 | 42,907         |             |
| <b>S20</b> | TI ( "self help" OR self-help OR "self manage*" OR self-manage* ) OR AB ( "self help" OR self-help OR "self manage*" OR self-manage* )                                                                                                           | 20,838         |             |
| <b>S19</b> | (MH "Community Health Workers")                                                                                                                                                                                                                  | 4,008          |             |
| <b>S18</b> | TI ( ((unqualified or unregistered or volunt*) N2 (therap* or worker* or coach* or facilitator* or practitioner*)) ) OR AB ( ((unqualified or unregistered or volunt*) N2 (therap* or worker* or coach* or facilitator* or practitioner*)) )     | 962            |             |
| <b>S17</b> | TI ( ("lay therapy" or lay-therapy or "lay therapist*" or lay-therapist* or "lay worker*" or lay-worker* or "lay person*" or lay-person* or "lay people" or lay-people) ) AND AB ( ("lay therapy" or lay-therapy or "lay therapist*" or lay-     | 82             |             |



Improving the mental health and mental health support available to adolescents with social care-experience via low-intensity life story work: A realist review protocol

|            |                                                                                                                                                                                                                                                                                                                                                                                                                                                                                       |         |
|------------|---------------------------------------------------------------------------------------------------------------------------------------------------------------------------------------------------------------------------------------------------------------------------------------------------------------------------------------------------------------------------------------------------------------------------------------------------------------------------------------|---------|
|            | therapist* or "lay worker*" or lay-worker* or "lay person*" or lay-person* or "lay people" or lay-people )                                                                                                                                                                                                                                                                                                                                                                            |         |
| <b>S16</b> | (MH "Telemedicine") OR (MH "Remote Consultation") OR (MH "Telepsychiatry")                                                                                                                                                                                                                                                                                                                                                                                                            | 17,115  |
| <b>S15</b> | (MH "Computer Assisted Instruction")                                                                                                                                                                                                                                                                                                                                                                                                                                                  | 8,174   |
| <b>S14</b> | (MH "Therapy, Computer Assisted")                                                                                                                                                                                                                                                                                                                                                                                                                                                     | 5,457   |
| <b>S13</b> | TI ( ((low-intensity or "low intensity" or minimal or brief or online or internet or tele* or mobile* or e-health or m-health or virtual) N2 (intervention* or program* or service* or package* or training* or therap* or treatment*)) ) OR AB ( ((low-intensity or "ow intensity" or minimal or brief or online or internet or tele* or mobile* or e-health or m-health or virtual) N2 (intervention* or program* or service* or package* or training* or therap* or treatment*)) ) | 34,674  |
| <b>S12</b> | S10 AND S11                                                                                                                                                                                                                                                                                                                                                                                                                                                                           | 19,442  |
| <b>S11</b> | S3 OR S4 OR S5 OR S6 OR S7 OR S8 OR S9                                                                                                                                                                                                                                                                                                                                                                                                                                                | 77,416  |
| <b>S10</b> | S1 OR S2                                                                                                                                                                                                                                                                                                                                                                                                                                                                              | 626,344 |
| <b>S9</b>  | (MH "Foster Home Care") OR (MH "Foster Parents") OR (MH "Child, Foster")                                                                                                                                                                                                                                                                                                                                                                                                              | 6,425   |
| <b>S8</b>  | (MH "Adoption") OR (MH "Child, Adopted") OR (MH "Adoptive Parents")                                                                                                                                                                                                                                                                                                                                                                                                                   | 4,102   |
| <b>S7</b>  | TI ( ((adopted OR adoption OR adoptive OR adoptee* OR "in-care" OR "in care") N2 (teen* OR youth* OR adolescen* OR juvenile* or young* OR child*)) ) OR AB ( ((adopted OR adoption OR adoptive OR adoptee* OR "in-care" OR "in care") N2 (teen* OR youth* OR adolescen* OR juvenile* OR young* OR child*)) )                                                                                                                                                                          | 37,133  |
| <b>S6</b>  | TI "child welfare" OR AB "child welfare"                                                                                                                                                                                                                                                                                                                                                                                                                                              | 4,278   |
| <b>S5</b>  | TI ("care leaver" OR "care experience*" OR care-experience* OR "leaving care" OR "care transition*") OR AB ("care leaver" OR "care experience*" OR care-experience* OR "leaving care" OR "care transition*")                                                                                                                                                                                                                                                                          | 5,533   |
| <b>S4</b>  | TI (foster* OR social OR public OR state OR "local authority" OR residential OR institutional OR permanent OR kinship OR relative OR substitute OR "out of home" OR out-of-home OR shelter OR surrogate) N1 care* OR AB (foster* OR social OR public OR state OR "local authority" OR residential OR institutional OR permanent OR kinship OR relative OR substitute OR "out of home" OR out-of-home OR shelter OR surrogate) N1 care*                                                | 31,528  |
| <b>S3</b>  | TI "looked after" OR looked-after OR AB "looked after" OR looked-after                                                                                                                                                                                                                                                                                                                                                                                                                | 723     |
| <b>S2</b>  | (MH ""Adolescence"")                                                                                                                                                                                                                                                                                                                                                                                                                                                                  | 569,286 |
| <b>S1</b>  | TI ( teen* OR youth* OR adolescen* OR juvenile* ) OR AB ( teen* OR youth* OR adolescen* OR juvenile* )                                                                                                                                                                                                                                                                                                                                                                                | 209,502 |

Improving the mental health and mental health support available to adolescents with social care-experience via low-intensity life story work: A realist review protocol

Improving the mental health and mental health support available to adolescents with social care-experience via low-intensity life story work: A realist review protocol

CDAS

**Ebscohost CDAS (Child Development and Adolescent Studies) (Start date unknown)**

Search run 3 February 2022

|           | Searches                                                                                                                                                                                                                                                                                                                                                                                                                                                                              | Results | Type |
|-----------|---------------------------------------------------------------------------------------------------------------------------------------------------------------------------------------------------------------------------------------------------------------------------------------------------------------------------------------------------------------------------------------------------------------------------------------------------------------------------------------|---------|------|
| <b>S1</b> | TI ( teen* OR youth* OR adolescen* OR juvenile* ) OR AB ( teen* OR youth* OR adolescen* OR juvenile* )                                                                                                                                                                                                                                                                                                                                                                                | 99,382  |      |
| <b>S2</b> | TI "looked after" OR looked-after OR AB "looked after" OR looked-after                                                                                                                                                                                                                                                                                                                                                                                                                | 698     |      |
| <b>S3</b> | TI (foster* OR social OR public OR state OR "local authority" OR residential OR institutional OR permanent OR kinship OR relative OR substitute OR "out of home" OR out-of-home OR shelter OR surrogate) N1 care* OR AB (foster* OR social OR public OR state OR "local authority" OR residential OR institutional OR permanent OR kinship OR relative OR substitute OR "out of home" OR out-of-home OR shelter OR surrogate) N1 care*                                                | 7434    |      |
| <b>S4</b> | TI ("care leaver" OR "care experience*" OR care-experience* OR "leaving care" OR "care transition*") OR AB ("care leaver" OR "care experience*" OR care-experience* OR "leaving care" OR "care transition*")                                                                                                                                                                                                                                                                          | 656     |      |
| <b>S5</b> | TI "child welfare" OR AB "child welfare"                                                                                                                                                                                                                                                                                                                                                                                                                                              | 5752    |      |
| <b>S6</b> | TI ( ((adopted OR adoption OR adoptive OR adoptee* OR "in-care" OR "in care") N2 (teen* OR youth* OR adolescen* OR juvenile* or young* OR child*)) ) OR AB ( ((adopted OR adoption OR adoptive OR adoptee* OR "in-care" OR "in care") N2 (teen* OR youth* OR adolescen* OR juvenile* OR young* OR child*)) )                                                                                                                                                                          | 14908   |      |
| <b>S7</b> | TI ( ((low-intensity or "low intensity" or minimal or brief or online or internet or tele* or mobile* or e-health or m-health or virtual) N2 (intervention* or program* or service* or package* or training* or therap* or treatment*)) ) OR AB ( ((low-intensity or "ow intensity" or minimal or brief or online or internet or tele* or mobile* or e-health or m-health or virtual) N2 (intervention* or program* or service* or package* or training* or therap* or treatment*)) ) | 2481    |      |
| <b>S8</b> | TI ( ("lay therapy" or lay-therapy or "lay therapist*" or lay-therapist* or "lay worker*" or lay-worker* or "lay person*" or lay-person* or "lay people" or lay-people) ) AND AB ( ("lay therapy" or lay-therapy or "lay therapist*" or lay-therapist* or "lay worker*" or lay-worker* or "lay                                                                                                                                                                                        | 5       |      |

Improving the mental health and mental health support available to adolescents with social care-experience via low-intensity life story work: A realist review protocol

|            |                                                                                                                                                                                                                                                  |       |
|------------|--------------------------------------------------------------------------------------------------------------------------------------------------------------------------------------------------------------------------------------------------|-------|
|            | person*" or lay-person* or "lay people" or lay-people) )                                                                                                                                                                                         |       |
| <b>S9</b>  | TI ( ((unqualified or unregistered or volunt*) N2 (therap* or worker* or coach* or facilitator* or practitioner*)) ) OR AB ( ((unqualified or unregistered or volunt*) N2 (therap* or worker* or coach* or facilitator* or practitioner*)) )     | 78    |
| <b>S10</b> | TI ( "self help" OR self-help OR "self manage*" OR self-manage* ) OR AB ( "self help" OR self-help OR "self manage*" OR self-manage* )                                                                                                           | 804   |
| <b>S11</b> | TI ( ((group* or peer*) N2 (intervention* or program* or service* or package* or training* or therap* or treatment)) ) OR AB ( ((group* or peer*) N2 (intervention* or program* or service* or package* or training* or therap* or treatment)) ) | 6798  |
| <b>S12</b> | TI ( "mental health" OR wellbeing OR well-being ) OR AB ( "mental health" or wellbeing or well-being )                                                                                                                                           | 24106 |
| <b>S13</b> | S2 OR S3 OR S4 OR S5 OR S6                                                                                                                                                                                                                       | 22614 |
| <b>S14</b> | S7 OR S8 OR S9 OR S10 OR S11                                                                                                                                                                                                                     | 9795  |
| <b>S15</b> | S1 AND S12 AND S13 AND S14                                                                                                                                                                                                                       | 61    |

Improving the mental health and mental health support available to adolescents with social care-experience via low-intensity life story work: A realist review protocol

Web of Science

Clarivate Web of Science Core Collection (SCI-EXPANDED and SSCI indexes) 1900 to present

Search run 2 February 2022

| Searches                                                                                                                                                                                                                   | Results | Type |
|----------------------------------------------------------------------------------------------------------------------------------------------------------------------------------------------------------------------------|---------|------|
| 1 TS=(((teen* OR youth* OR adolescen* OR juvenile*)))                                                                                                                                                                      | 757523  |      |
| 2 TS=("looked after" OR "looked-after")                                                                                                                                                                                    | 776     |      |
| 3 TS=((foster* OR social OR public OR state OR "local authority" OR residential OR institutional OR permanent OR kinship OR relative OR substitute OR "out of home" OR out-of-home OR shelter OR surrogate) NEAR/1 care*)  | 43729   |      |
| 4 TS=("care leaver" OR "care experience*" OR care-experience* OR "leaving care" OR "care transition*")                                                                                                                     | 6760    |      |
| 5 TS=("child welfare")                                                                                                                                                                                                     | 8425    |      |
| 6 TS=(((adopted or adoption or adoptive or adoptee* or "in-care" or "in care") NEAR/3 (teen* or youth* or adolescen* or juvenile* or young* or child* or girl? or boy?)))                                                  | 7120    |      |
| 7 or/2-6                                                                                                                                                                                                                   | 61902   |      |
| 8 TS=(((low-intensity or minimal or brief or online or internet or tele* or mobile* or e-health or m-health or virtual) NEAR/2 (intervention* or program* or service* or package* or training* or therap* or treatment*))) | 90429   |      |
| 9 TS=((lay-therapy or lay-therapist* or lay-worker* or lay-person* or lay-people))                                                                                                                                         | 2561    |      |
| 10 TS=((para-professional* or non-specialist* or non-clinician* or health worker* or support worker*))                                                                                                                     | 120315  |      |
| 11 TS=(((unqualified or unregistered or volunt*) NEAR/2 (therap* or worker* or coach* or facilitator* or practitioner*)))                                                                                                  | 1938    |      |
| 12 TS=(self-help or self-manage*)                                                                                                                                                                                          | 41426   |      |
| 13 TS=((group* or peer*) NEAR/2 (intervention* or program* or service* or package* or training* or therap* or treatment))                                                                                                  | 263661  |      |
| 14 #13 OR #12 OR #11 OR #10 OR #8 OR #9                                                                                                                                                                                    | 499546  |      |
| 15 TS=((mental health or wellbeing or well-being))                                                                                                                                                                         | 409139  |      |
| 16 #15 and #14 and #7 and #1                                                                                                                                                                                               |         |      |
| 17 limit to english language                                                                                                                                                                                               |         |      |

Improving the mental health and mental health support available to adolescents with social care-experience via low-intensity life story work: A realist review protocol

Social Care Online

### SCIE Social Care Online 1980 to present

Search run 3 February 2022

| Searches                                                                                                                                                                                                                                                                                                                      | Results | Type |
|-------------------------------------------------------------------------------------------------------------------------------------------------------------------------------------------------------------------------------------------------------------------------------------------------------------------------------|---------|------|
| 1 teen or youth or adolescent or juvenile                                                                                                                                                                                                                                                                                     |         |      |
| 2 looked after OR "foster care" OR "social care" OR "public care" OR "state care" OR "local authority care" OR "residential care" OR "institutional care" OR "permanent care" OR "kinship care" OR "relative care" OR "substitute care" OR "out of home care" OR "shelter care" OR adopted OR adoption OR adoptive OR adoptee |         |      |
| 3 <i>low intensity OR minimal OR brief OR online OR digital OR internet OR tele OR mobile OR e-health OR m-health OR virtual</i>                                                                                                                                                                                              |         |      |
| 4 mental health OR wellbeing OR "well being"                                                                                                                                                                                                                                                                                  |         |      |
| 5 1 and 2 and 3 and 4                                                                                                                                                                                                                                                                                                         | 29      |      |
| 1 teen or youth or adolescent or juvenile                                                                                                                                                                                                                                                                                     |         |      |
| 2 looked after OR "foster care" OR "social care" OR "public care" OR "state care" OR "local authority care" OR "residential care" OR "institutional care" OR "permanent care" OR "kinship care" OR "relative care" OR "substitute care" OR "out of home care" OR "shelter care" OR adopted OR adoption OR adoptive OR adoptee |         |      |
| 3 <i>"lay therapy" OR "lay therapist" OR "lay worker" OR "lay person" OR "lay people" OR "paraprofessional" OR "non-specialist" OR "non-clinician" OR "health worker" OR coach OR facilitator OR practitioner OR unqualified OR unregistered OR volunteer</i>                                                                 |         |      |
| 4 mental health OR wellbeing OR "well being"                                                                                                                                                                                                                                                                                  |         |      |
| 5 1 and 2 and 3 and 4                                                                                                                                                                                                                                                                                                         | 7       |      |
| 1 teen or youth or adolescent or juvenile                                                                                                                                                                                                                                                                                     |         |      |
| 2 looked after OR "foster care" OR "social care" OR "public care" OR "state care" OR "local authority care" OR "residential care" OR "institutional care" OR "permanent care" OR "kinship care" OR "relative care" OR "substitute care" OR "out of home care" OR "shelter care" OR adopted OR adoption OR adoptive OR adoptee |         |      |
| 3 <i>"self care" OR "self help" OR "self management" OR group OR peer</i>                                                                                                                                                                                                                                                     |         |      |
| 4 mental health OR wellbeing OR "well being"                                                                                                                                                                                                                                                                                  |         |      |
| 5 1 and 2 and 3 and 4                                                                                                                                                                                                                                                                                                         | 21      |      |
| NB search strategies adapted for simpler search interface and run in three separate queries                                                                                                                                                                                                                                   |         |      |

Improving the mental health and mental health support available to adolescents with social care-experience via low-intensity life story work: A realist review protocol
